Additivity of multiple threats

1        **Superadditive and subadditive dynamics are**  
2        **not inherent to the types of interacting threat**

3

4

**V Haller-Bull<sup>1,2,3¶\*</sup> and M Bode<sup>1,3&</sup>**

5

*1. ARC Centre of Excellence for Coral Reef Studies, James Cook University, Townsville,*

6

*Australia*

7

*2. AIMS@JCU, Australian Institute of Marine Science, Townsville, Australia*

8

*3. School of Mathematical Sciences, Queensland University of Technology, Brisbane,*

9

*Australia.*

10

11

12

**\*Corresponding author:**

13

**Email: [v.haller@hdr.qut.edu.au](mailto:v.haller@hdr.qut.edu.au)**

14

15

16

.

## Additivity of multiple threats

### 17 **Abstract**

18 Species and ecosystems usually face more than one threat. The damage caused by these  
19 multiple threats can accumulate nonlinearly: either subadditively, when the joint damage of  
20 combined threats is less than the damages of both threats individually added together, or  
21 superadditively, when the joint damage is worse than the two individual damages added  
22 together. These additivity dynamics are commonly attributed to the nature of the  
23 threatening processes, but conflicting empirical observations challenge this assumption.  
24 Here, we provide a theoretical demonstration that the additivity of threats can change with  
25 different magnitudes of threat impacts. We use a harvested single-species population  
26 model to integrate the effects of multiple threats on equilibrium abundance. Our results  
27 reveal that threats do not always display consistent additive behavior, even in simple  
28 systems. Instead, their additivity depends on the magnitudes of the two threats, and the  
29 population parameter that is impacted by each threat. In our model specifically, when  
30 multiple threats impact the growth rate of a population, they display superadditive  
31 dynamics at low magnitudes of threat impacts. In contrast, threats that impact the carrying  
32 capacity of the environment are always additive or subadditive. These dynamics can be  
33 understood by reference to the curvature of the relationship between a given parameter  
34 (e.g., growth) and equilibrium population size. Our results suggest that management  
35 actions can achieve amplified benefits if they target threats that affect the growth rate, and  
36 low-magnitude threats, since these will be in a superadditive phase. More generally, our

## Additivity of multiple threats

37 results suggest that cumulative impact theory should focus on the magnitude of the impact  
38 on the population parameter, and should be cautious about attributing additive dynamics to  
39 particular threat combinations.

### 40 **Keywords**

41 threat interactions, superadditivity, subadditivity, multiple threats, threat management,  
42 prioritization

### 43 **Introduction**

44 Species and ecosystems across the globe are exposed to a large variety of threats. When  
45 considering an ecosystem, for example, coral reefs, there can be a variety of threat sources,  
46 including local, direct impacts such as fishing; land-based impacts such as water quality;  
47 and global impacts such as coral bleaching (1, 2). The damages caused by these threats are  
48 rarely straightforward since they can interact and display nonlinear behaviors (3), which  
49 can either magnify, reduce, or erase the benefits of management actions (2, 4, 5).

50 When multiple threats occur simultaneously (6), the damage they cause to an ecosystem  
51 feature (e.g., a species' population) is a result of each individual threat, and the interaction  
52 between them (5, 7). Interactions can occur in a variety of ways; here, we focus solely on  
53 interactions that occur within a single population. The accumulated effects of multiple  
54 threats are not always additive, meaning two threats aren't always twice as bad as one, but

## Additivity of multiple threats

55 rather can display super- or subadditive behavior. The existence of non-additive threat  
56 interaction dynamics has been shown repeatedly (7-10). Subadditivity occurs when the  
57 damages caused by the combined threats,  $D(A\&B)$ , are smaller than the sum of the effects  
58 of the individual threats,  $D(A\&B) < D(A)+D(B)$  (11). Similarly, superadditivity is defined  
59 as the joint damage being larger than the sum of the individual effects,  $D(A\&B) >$   
60  $D(A)+D(B)$  (11). To give an example: in a controlled laboratory experiment, a mollusk  
61 *Dolabrifera brazier* experienced a decrease in population size of 10% at high salinity, and  
62 a decrease in population size of 25% when exposed to high UV radiation. If the joint  
63 damage of these two threats was additive, then we would expect a decrease of 35% when  
64 both threats are present. However, the decrease in the presence of both threats was  
65 measured at a superadditive 80% (12).

66 The majority of studies on threat interactions rely on experimental or observational  
67 methods. The main aim of these studies is to identify which threat combination (e.g.,  
68 salinity and light, or salinity and temperature) displays which type of additivity. However,  
69 the studies often disagree about the type of additivity, even when considering the same  
70 study species and threats. As with the *D. brazier* example, interacting threats are generally  
71 investigated using field or laboratory experiments (7). Crain, Kroeker (7) reviewed 202  
72 studies on these interaction types in marine systems and found that 26% of threat  
73 combinations are additive, while 36% are superadditive and 38% are subadditive. There  
74 was also variation within threat combinations: all threat combinations that had been  
75 thoroughly investigated displayed all three additivity types (7). For example, 34

## Additivity of multiple threats

76 independent factorial experiments that investigate the impact of UV light and fishing found  
77 additive impacts in 17 cases, subadditive impacts in 5 cases and superadditive impacts in  
78 12 cases (7). So far, this variation is explained by context dependence (7), including the  
79 number of threats considered and the trophic level of the species experiencing the threat.  
80 Here, we investigate an alternative explanation for the observed variation: additivity of  
81 joint damages of threats can change with varying magnitude of threat impacts.

82 Investigating different magnitudes of threat impacts is difficult in both observational and  
83 experimental studies because any experiment would need to be structured factorially, with  
84 the species or community being exposed to the threats individually and in combination,  
85 across a range of magnitudes. For example, Schlöder and D'Croz (13) investigated the  
86 effect of temperature and nitrate on two coral species, *Pocillopora damicornis* and *Porites*  
87 *lobate*. In this experiment, 60 coral pieces were grown for 30 days in isolation and the  
88 frequency and volume of their zooxanthellae was measured. The magnitude of the threat  
89 was only classified in two (nitrate) or three (temperature) categories, resulting in six  
90 possible scenarios and leaving five replicates per species. Even an increase to three levels  
91 in nitrate would result in an increase of the combinations to nine combinations and 90 coral  
92 fragments if keeping the replication constant. This makes the investigation of many  
93 different magnitudes of threat impacts very challenging; modelling studies need to be used  
94 to address these kind of questions more holistically. Simulations of threats at many trophic  
95 levels, including all of their impacts and magnitudes, as well as utilising large sample sizes  
96 can be analysed to draw conclusions that are more generalizable. In contrast, models can

## Additivity of multiple threats

97 evaluate threats and their management in situations where manipulation or experimentation  
98 is challenging (5, 14, 15).

99 When a threat on a population occurs it passes through several stages before we see the  
100 damage (Fig. 1). In this paper, we distinguish between impact and damage. The impact is  
101 defined as the actual reduction of a population parameter that the threat causes (Table 1).  
102 For example, we could have a cyclone (a threat) occurring at a reef. This cyclone might  
103 reduce the amount of habitat available for the fish population, i.e. the carrying capacity is  
104 reduced. This reduction of the fishes carrying capacity is the actual impact on the  
105 population. Damage on the other hand is the effect of the cyclone that we can measure at  
106 some point after the threat has occurred, usually this is a population reduction.

107 **Figure 1. Schematic diagram of threats impacting on populations**

108

109

110 **Table 1. Definition and connection of commonly used terms in this paper**

| Term | Definition |
|------|------------|
|------|------------|

## Additivity of multiple threats

|                            |                                                                                                                                                                                                                                                                                 |
|----------------------------|---------------------------------------------------------------------------------------------------------------------------------------------------------------------------------------------------------------------------------------------------------------------------------|
| Impact                     | Impact is the proportion of the population parameter that is reduced by the threat.                                                                                                                                                                                             |
| Joint impact               | Joint impact is the combined impact that two threats have on one population parameter.                                                                                                                                                                                          |
| Damage (D)                 | Damage is the change in the population equilibrium that is caused by one or more threats. This damage is what is measured in observational studies.                                                                                                                             |
| Joint damage ( $D_{1,2}$ ) | Joint damage is the reduction in population equilibrium size that can be measure after two threats have occurred.                                                                                                                                                               |
| Additivity index           | The additivity index gives a characteristic of the joint damage in relation to the dame caused by a single threat. It ranges from -1 to 1 and can be categories as additivity types: superadditive ( $-1 \leq A < 0$ ), additive ( $A = 0$ ) or subadditive ( $0 < A \leq 1$ ). |

111

112 In this study, we analyse the conditions within a population and threats that lead to  
113 superadditive and subadditive behaviour. Our aim is to theoretically investigate the  
114 additivity of joint threats, and to offer a more nuanced understanding of the factors that  
115 influence additivity. We are especially interested in understanding how additivity varies  
116 with different magnitudes of threat impacts, and how it depends on the parameters  
117 impacted by the threats. We use a suite of single-species population models to simulate  
118 damages caused by threats in isolation and combination to identify the interaction  
119 behaviour. Then, we identify and explain the conditions that lead to super- and  
120 subadditivity. Finally, possible management actions are simulated and their relative  
121 benefits depending on the additivity are compared.

## Additivity of multiple threats

### 122 **Methods**

123 Our analyses are based on a single-species population model – the harvested logistic model  
124 (Eq. 1) – which allows us to derive some results analytically, and to more easily interpret  
125 them in the context of cumulative threat theory. Threats are modelled as proportional  
126 reductions ( $a$  and  $b$ ) in two population parameters: the growth rate ( $r$ ), and the carrying  
127 capacity ( $K$ ) respectively. So the logistic model

$$128 \quad \frac{dN}{dt} = rN\left(1 - \frac{N}{K}\right) - hN \quad (\text{Eq. 1})$$

129 becomes

$$130 \quad \frac{dN}{dt} = (1 - a_i)rN\left(1 - \frac{N}{(1 - b_i)K}\right) - hN \quad (\text{Eq. 2})$$

131 in the presence of threat  $i$ .

132 We note that in this model, a single threat  $i$  can affect both our population parameters. For  
133 example, in coral reef ecosystems sedimentation simultaneously reduces the habitat  
134 available to corals ( $K$ ), and increases coral mortality ( $r$ ). Our approach would therefore  
135 allow this single threat to interact with itself. In Eq. 1 and Eq. 2,  $r$  = growth rate,  $(1 - a_i$   
136  $)$  = impact on the growth rate,  $K$  = carrying capacity,  $(1 - b_i)$  = impact on carrying  
137 capacity,  $h$  = harvest rate, also  $0 \leq a_i, b_i, r, h \leq 1$  and  $h < r$ . A value of zero for either  $a_i$  or  
138  $b_i$  therefore indicates no impact of the threat on the parameter, while a value of one



## Additivity of multiple threats

139 indicates a total loss of the process represented by the parameter. Our analyses focus on the  
140 equilibrium population in the face of multiple threats that each impact the population to  
141 form a new population equilibrium,

$$142 \quad N^*(a_i, b_i) = \left(1 - \frac{h}{(1-a_i)r}\right)(1-b_i)K. \quad (\text{Eq. 3})$$

143 If  $N^*(a_i, b_i) < 0$ , we consider the population to be extinct and set  $N^*(a_i, b_i) = 0$ . In the  
144 figures a line is added that separates extinct populations.

145 Furthermore, we define the damage ( $D$ ) to be the reduction in population size caused by  
146 the threat:

$$147 \quad D = N^*(0,0) - N^*(a_i, b_i). \quad (\text{Eq. 4})$$

148 Two threats acting upon one parameter could be modelled in two ways: multiplicative  
149  $(1 - b_1) * (1 - b_2)$  or additive  $(1 - b_1) + (1 - b_2)$ . Both of these are reasonable. Additive  
150 impacts would indicate that the two impacts occur independently with no influence on one  
151 another, while multiplicative would indicate that they change the impact of one another.  
152 One example for non-independence is if they act consecutively, i.e. the impact of threat 2  
153 affects the parameter that has already been impacted by threat 1. Which one is most  
154 appropriate could be dependent on the actual threats and how they affect the physiologic  
155 state of the modelled organisms. However, this is not something that is usually  
156 investigated, so it is hard to determine which one is more appropriate in a given situation.

## Additivity of multiple threats

157 Here we present the results of the additive model, however the analysis for the  
158 multiplicative version can be found in the supplementary materials. Furthermore, the  
159 supplementary materials also provide the results for the equivalent analysis for the  
160 Beverton-Holt (S2) and the Ricker model (S3). While there are slight differences in the  
161 actual results, all major conclusions in this paper are supported by the results of both  
162 analyses.

163 To categorise the joint damage caused by multiple threats we have created an additivity  
164 index (A). It is based on the population equilibria in the presence and absence of the  
165 threats. Basically the additivity index is equal to the sum of the damage caused by each  
166 threat separately, minus the damage caused by both threat simultaneously,

$$167 \quad A = D_1 + D_2 - D_{1,2}. \quad (\text{Eq. 5})$$

168 When A is negative the joint damage is superadditive; when A is positive then the joint  
169 damage is subadditive.

170 We consider four different types of interacting threats (Table 2). In our first two cases, both  
171 threats impact only one parameter, either the carrying capacity ( $a_1 = a_2 = 0, b_1, b_2 \neq 0$ ) or  
172 the growth rate ( $a_1, a_2 \neq 0, b_1 = b_2 = 0$ ). In case three and four, threats impact both  
173 parameters. Case three only considers interactions between parameters ( $a_1, b_1 \neq 0, a_2 = b_2$   
174  $= 0$ ) while case four considers both interactions between and within both parameters ( $a_1,$   
175  $a_2, b_1, b_2 \neq 0$ ).

## Additivity of multiple threats

176 *Table 2. Analytical conditions for the four special cases with  $r$ =growth rate,  $a$ =impact of*  
 177 *the threat on growth rate,  $h$ =harvest rate and  $b$ =impact on carrying*

| Case                                                           | Parameters                               | Additivity index (logistic model)                                                                      |
|----------------------------------------------------------------|------------------------------------------|--------------------------------------------------------------------------------------------------------|
| Both threats only impact the carrying capacity                 | $a_1 = a_2 = 1$<br>$0 < b_1, b_2 < 1$    | $K(b_2 - 1)(b_1 - 1)\left(1 - \frac{h}{r}\right)$<br>$\Rightarrow$ Always positive                     |
| Both threats only influence the growth rate                    | $0 < a_1, a_2 < 1$<br>$b_1 = b_2 = 1$    | $\left(\frac{1}{a_1} - \frac{1}{a_1 a_2} - \frac{1}{a_2} - 1\right)K_r^h$                              |
| One threat of the growth rate and one on the carrying capacity | $a_2 = b_1 = 1$<br>$0 < a_1, b_2 < 1$    | $K\left(\frac{h}{r}\left(\frac{b}{a} - 1\right)^2 + (b - 1)^2\right)$<br>$\Rightarrow$ Always positive |
| Both threats influence both parameters                         | $0 < a_1, a_2 < 1$<br>$0 < b_1, b_2 < 1$ | $(1 + a_1 b_2 - b_2 - a_1)K_r^h$                                                                       |

178

179 We first analytically analyse the additivity index for the different cases. However, since the  
 180 interaction is not consistent for each case, we cannot find one overall condition rather a set  
 181 of conditional statements that depend on the case (Table 2). While correct, these statements  
 182 are difficult to interpret, consequently, we use simulations to further investigate the  
 183 conditions for additivity through simulations. We simulate  $10^6$  random populations  
 184 (randomly chosen values for  $r$ ) at different magnitudes (0 to 1) of the threat impact over  
 185 1000 timesteps, to reach the equilibrium population size. Since the ratio of  $\frac{h}{r}$  changes the  
 186 magnitude of the threat impact at which the additivities occur, we have chosen specific  
 187 values for  $\frac{h}{r}$  and split the simulations according to those values, to enable better  
 188 visualisation. Those values are  $\frac{h}{r} = 0.2$ ,  $\frac{h}{r} = 0.5$  or  $\frac{h}{r} = 0.8$ . Since  $r$  is chosen randomly,  $h$  is

## Additivity of multiple threats

189 assigned to each simulation so that  $\frac{h}{r}$  equals the value specified for each group. Equilibria  
190 are re-calculated three times for each random population with three different treatments:  
191 each one of the threats acting separately, and then the two threats interacting. The  
192 additivity index of the two threats for each population is calculated (Eq. 4).

193 Finally, we simulated the effects of management by decreasing one or both threats by 5%  
194 and recalculating the long-term population equilibrium. Management actions could be  
195 designed to reduce the threat as a whole, for example reducing fishing pressure, or to  
196 reduce the impact on one population parameter, for example fishing technique is changed  
197 so that less habitat destruction is caused. For simplicity, it is assumed here that a  
198 management action reduces the impact of a threat on both population parameters  
199 simultaneously and equally. The benefit is recorded for random populations and across the  
200 magnitude of threat impacts of all cases (~100,000 data points per case)

$$201 \quad \textit{Benefit} = \frac{N^*(a\_managed, b\_managed) - N^*(a, b)}{N^*(1, 1)} \quad (\text{Eq. 6})$$

## 202 **Results**

203 The results of the simulations agree with the results of the analytical analysis; consequently  
204 both are appropriate for analysing the threat interactions. However, caution has to be given  
205 to the defined parameter space to prevent negative population sizes.

## Additivity of multiple threats

206 Cases 1 and 2 both concentrate on one of the population parameters (Fig 2). These two  
207 cases show very different patterns in the joint damages. Two threats on the carrying  
208 capacity always cause a joint damage that is additive until the extinction line (at which  
209 point at least one threat can cause extinction) where the joint damage becomes necessarily  
210 subadditive. The threats on the growth rate, however, display a joint damage that is  
211 additive at low magnitudes of threat impacts and superadditive at high magnitudes of threat  
212 impacts. Within the area of extinctions there will again be subadditive joint damage.  
213 Generally, it can be said that the additivity index decreases from zero towards negative one  
214 until it hits the extinction line, then the additivity index starts to increase until it reaches  
215 positive 1. As harvest levels increase (Fig 2), the extinction line moves closer towards the  
216 origin, as extinction occurs at lower threat levels.

217 **Figure 2. Additivity indices for  $10^6$  simulations of random values for h and r split into**  
218 **three cases depending on the parameter impacted by the threats. The four cases**  
219 **represent: a-c: Case 1; Two threats that only influence the carrying capacity (  $a_1 = a_2$**   
220  **$= 0, b_1, b_2 \neq 0$  ); d-f: Case 2; Two threats that only influence the growth rate (  $a_1, a_2$**   
221  **$\neq 0, b_1 = b_2 = 0$  ); g-i: Case 3; Each parameter is only influenced by one threat (  $a_1,$**   
222  **$b_1 \neq 0, a_2 = b_2 = 0$  ) ; j-l: Case 4; Both threats influence both parameters(  $a_1, a_2, b_1, b_2$**   
223  **$\neq 0$  ). The columns indicate the level of harvest relative to the population growth rate.**  
224 **Between the origin and the extinction line, the population of organisms persists in the**  
225 **present of the threats, from the extinction line onwards, the population will go extinct**  
226 **in the presence of at least one threat in isolation. The interpretation of an additivity**

## Additivity of multiple threats

227 **index of zero has to be done carefully, since the graph aligns all values in the range**  
228  **$-0.02 < 0 < 0.02$  as zero. While there are truly additive impacts, the line from**  
229 **additive to subadditive is less distinct and more like a gradual decrease in A.**

230 Case 3 demonstrates the joint damage when both parameter are impacted. This case shows  
231 only additive and subadditive damage similar to case 1. However, subadditivity now also  
232 occurs without the presence of extinction. Furthermore, it is interesting to note that changes  
233 to the impact on the growth rate ( $a_1$ ) and changes to the impact on the carrying capacity (  
234  $b_1$ ) do not cause the same change in the additivity index.

235 In case 4, both threats impact both the carrying capacity and the growth rate. This means  
236 that we can compare it directly with case 1 and 2, since they are basically a subset of the  
237 simulations displayed within case 4. The only difference is that the results are collapsed  
238 into a lower dimensional space. For example, case 1 shows the impact of threat 2 on the  
239 carrying capacity on the y-axis and the impact of threat 1 on the carrying capacity on the x-  
240 axis. In case 4, both impacts are displayed on the y-axis by simple addition. This means  
241 that when the impact on the growth rate is very low in case 4 ( $a_1 + a_2 = 0$ ), then case 4 is  
242 equivalent to case 1. Similarly we can find the results from case 2 in case 4 buy setting the  
243 impact on the carrying capacity close to zero ( $b_1 + b_2 = 0$ ). The rest of the case 4  
244 compromises a mixture of sub- and superadditivity. Superadditivity occurs only at high  
245 impacts on the growth rate, while subadditivity mainly occurs at medium impacts on both  
246 the growth rate and carrying capacity. The absolute magnitude of the additivity index still

## Additivity of multiple threats

247 increases towards the extinction line and decreases after the extinction line with increasing  
248 impacts of one or either population parameters.

249 Next, we consider the relationship between the population parameter and the population  
250 equilibrium (Fig 3). When increasing the threats (e.g. from 0 to 1) on the growth rate we  
251 can see a decrease in the population equilibrium (Fig 3A). This decrease is first slow then  
252 becomes steeper resulting in a concave relationship. On the other hand, when increasing  
253 the threat impacts on the carrying capacity the population equilibrium decreases linearly  
254 (Fig 3B). Finally, when we increase the impact on both parameters at different levels (Fig  
255 3C), we can identify all three; convex (red line), linear (blue lines) and concave (green  
256 line) relationships (Fig 3D).

257 **Figure 3. Relationships between the threats on (A) growth rate, (B) carrying capacity,**  
258 **(C&D) growth rate and carrying capacity and the population equilibrium. Part A.**  
259 **shows a concave relationship between the threats impacting the growth rate and the**  
260 **population equilibrium for all levels of the carrying capacity. Part B shows a linear**  
261 **relationship between the threats impacting the carrying capacity and the population**  
262 **equilibrium for all magnitudes of the growth rate. Part C shows a contour graph of**  
263 **the population equilibrium with varying threats impacting the growth rate and the**  
264 **carrying capacity. Furthermore, slices are highlighted (lines) that are displayed in**  
265 **Part D. The x-axis in part D represents the magnitude of the impact of the threats on**  
266 **the growth rate. The threats impacting the carrying capacity are also varied and can**

## Additivity of multiple threats

267 **be identified using the appropriate linear function to calculate b. Part D shows that**  
268 **depending on the slice we choose from Part C both concave and convex relationships**  
269 **can be found when all threat impacts are varied.**

270 Management benefit per 5% threat impact change displays a large variation from as low as  
271 0% increase of the no threat population equilibrium up to 4300% increase (Table 3). Both  
272 extremes occur when the equilibrium populations are close to zero before management.

273 **Table 3. Statistics summarising all of the simulations used for Fig. 4 divided**  
274 **according to the cases and extinction status after the management on the threats**

| Statistic                            | Case 1 | Case 2            | Case 3            | Case 4              |
|--------------------------------------|--------|-------------------|-------------------|---------------------|
| <b>Including extinct populations</b> |        |                   |                   |                     |
| Minimum                              | 0.28   | 0                 | 0                 | 0                   |
| Q1                                   | 3.773  | 0                 | 0                 | 0                   |
| Median                               | 5.25   | 0                 | 4.48              | 0                   |
| Q3                                   | 6.71   | 003.153           | 6.71              | 2.22                |
| Maximum                              | 100    | 2894.1            | 4374.7            | 295.59              |
| <b>Excluding extinct populations</b> |        |                   |                   |                     |
| Minimum                              | 0.28   | $4 \cdot 10^{-4}$ | $4 \cdot 10^{-4}$ | $1.5 \cdot 10^{-3}$ |
| Q1                                   | 3.773  | 5.63              | 4.31              | 3.191               |
| Median                               | 5.25   | 12.17             | 5.41              | 5.499               |
| Q3                                   | 6.71   | 18.95             | 7.79              | 8.912               |
| Maximum                              | 100    | 2894.1            | 1803.7            | 186.74              |

275

276 Several factors influence the management benefit experienced by a population when  
277 particular threats are decreased. First, there is the magnitude of the threat impact. The  
278 impact on the parameter growth rate shows some variation with benefit being higher in the



## Additivity of multiple threats

279 extreme case (high and low magnitude) versus the medium magnitude (Fig 4a). On the  
280 other hand, the threat impact of the carrying capacity shows a clear decrease of  
281 management benefit with a decrease in magnitude. The lowest threat impact doubles or  
282 even triplets the management benefit experienced (Fig 4b). The largest amount of variation  
283 is explained when we consider the additivity together with the benefit (Fig 4c). More  
284 superadditive behavior lead to over ten times the benefit compared to cases where very  
285 subadditive damage is displayed.

286 **Figure 4. Management benefit ( $\pm 1.96 * SE$ ) when reducing both threats simultaneously**  
287 **according to the four cases. Panel a) splits the benefit for different magnitudes of**  
288 **threat impact on the parameter carrying capacity. Panel b) splits the benefit for**  
289 **different magnitudes of threat impacts on the growth rate. Low impact  $< 0.25$ ;  $0.25 <$**   
290 **Medium-Low impact  $< 0.5$ ;  $0.5 <$  Medium-High impact  $< 0.75$ ; High impact  $> 0.75$ .**  
291 **Panel c) splits the benefit depending on the additivity type. High superadditivity  $< -$**   
292  **$0.5$ ;  $-0.5 <$  Low superadditivity  $< 0$ ;  $0 <$  Low subadditivity  $< 0.5$ ; High subadditivity  $>$**   
293  **$0.5$ .**

294

## Additivity of multiple threats

### 295 **Discussion**

296 This study explored the interaction behaviour of two threats acting upon two population  
297 parameters in theoretical populations. We found that, contrary to orthodox assumptions,  
298 the joint damage of threats is not inherent to the particular threat combination (7, 9). Even  
299 in a simple, one-species model, the additivity can exhibit qualitative changes, depending on  
300 the affected parameter, and the magnitude of the impact on a threat. Our results therefore  
301 suggest that studies or reviews should be careful when they attribute the qualitative type of  
302 additivity to particular combinations of threats (4), and be aware that the parameters  
303 affected and the magnitude of the impact could be driving the threat behaviour.

304 In our models, superadditivity only occurs if there are several impacts on the growth rate.  
305 This can be explained by the concave relationship between the intrinsic growth rate and the  
306 equilibrium population size (Fig. 3a). Following this curve toward the origin, we see that  
307 the slope increases in response to increasing threats. A threat with twice the impact will  
308 therefore cause more than double the damage to the equilibrium population size. In  
309 contrast, the joint damage of threats will be additive when the slope is constant, i.e. a linear  
310 relationship between the population parameter and the population equilibrium. On the  
311 other hand, the additive joint damage when only the carrying capacity is impacted can be  
312 related to the linearity of its relationship to the equilibrium population size (Fig. 3b).

## Additivity of multiple threats

313 During this study, we found a few occasions where concavity does not predict all of the  
314 interactions that we can find, i.e. this generalization seems to contradict our results. For  
315 example, at high magnitude of threat impacts there are subadditive interactions. On closer  
316 examination, we found that all of these subadditive data points resulted in extinction. This  
317 subadditivity can only be found in the simulation results, the analytical analysis results in  
318 negative population sizes, which are not ecologically defined. Consequently, the data  
319 points resulting in extinction (negative population sizes, subadditivity) lay outside the  
320 realm of definition of the concave function.

321 Interestingly, reducing both parameters simultaneously can cause both super- and  
322 subadditivity at varying magnitudes of threat impacts. This is also reflected in the  
323 parameter-equilibrium relationships that can be both convex and concave (Fig. 3c-d). This  
324 means that at high levels of the growth rate and the carrying capacity the curve is concave,  
325 causing superadditivity and at low levels convex, causing subadditivity without extinction.  
326 This confirms our results and leads to the conclusion that we can infer the additive  
327 behavior from the curvature of the applicable curve.

328 Additivity of multiple threats has been considered in terms of conservation and  
329 management of populations repeatedly. In many cases, the opinion is that superadditivity is  
330 the worst case for the population (16, 17). However, superadditivity can also be the best  
331 case scenario when considered from the perspective of management (18). Our results  
332 support this since superadditive threats result in the largest proportional management

## Additivity of multiple threats

333 benefit. This can be especially true when we consider local versus global, manageable  
334 versus unmanageable, threats. Superadditivity can mean that by reducing a manageable  
335 threat we can simultaneously achieve a reduction in the damage caused by the  
336 unmanageable threat (5). On the other hand subadditivity would mitigate the benefit from  
337 the management of a single threat and, consequently, the management action could be of  
338 small use. Following from here is that the management benefits are easiest to predict for an  
339 additive threat combination (9).

340 These results in combination with the commonly-conducted cumulative threat mapping (6,  
341 19) can be used to prioritise management actions. Prioritising management is especially  
342 important in ecosystems that spread over large areas where it is impossible to protect the  
343 full extent of a species (20). In such systems prioritising management actions is crucial.  
344 When prioritising there are many aspects to consider, such as cost, risk, suitability and  
345 resulting benefit (21). The analysis shown here can aid in the assessment of the suitability  
346 for management of different areas and likely benefit that can be achieved. Global threats  
347 are always difficult to manage for local government so are less suitable. So if a global  
348 threat impacts all areas of conservation concern, but different local threats impact specific  
349 areas, then according to the analysis here, we might want to protect the areas that are  
350 impacted by superadditive threats. Furthermore, the actual benefit that a management  
351 action can result in is influenced by all threats to this system. The analysis conducted here,  
352 i.e. knowledge of the parameters impacted by each threat can help to estimate likely

## Additivity of multiple threats

353 benefits. Therefore, these findings could streamline some aspects of management  
354 prioritisations.

355 The study utilises a simple logistic model that considers one population in isolation. This is  
356 not particularly realistic since all species interact with other species and threats can also  
357 interact with each other through those species. However, for this study a simple model is  
358 used to highlight the complexities that interactions introduce. It is important to note here  
359 that a more complex model will result in more complexities in the result not less. The  
360 simple model also provides a framework to interpret and explain some of the phenomena  
361 that are likely to still play a role in more complex communities. The applicability of these  
362 results for many populations is also confirmed through the use of the Beverton-Holt and  
363 the Ricker model that both showed the same patterns of additivity (S1). Future work will  
364 aim to transfer the conclusions and explanations from a single population in this study to  
365 more complex community level models.

## 366 **Conclusions**

367 This study has provided an overview of the complexity of behaviors that interacting threats  
368 can display. Overall, the traditional idea of assigning types of interactions to threat  
369 combinations is re-conceptualized to a fluid concept of interactions depending on the  
370 parameters impacted. Besides the large complexities found in this study, clear conclusions  
371 can be drawn about the origins of superadditive behavior; several threats that impact the

## Additivity of multiple threats

372 growth rate of a population. Furthermore, this characteristic, superadditivity, can be  
373 connected to more efficient management and inform a prioritization of locations with  
374 different interacting threats.. More generally, the interaction behavior can be predicted by  
375 the curvature of the relationship between the impacted parameter and the equilibrium  
376 population size; a convex relationship implies subadditivity, and a concave relationship  
377 implies superadditivity. Finally, this study urges ecologists to focus on identifying the  
378 parameter and relative magnitude of threat impacts rather than the additivity type as a  
379 result of the threat combination.

## 380 Literature cited

- 381 1. Brown CJ, Saunders MI, Possingham HP, Richardson AJ. Managing for  
382 interactions between local and global stressors of ecosystems. *PloS one*. 2013;8(6):e65765.
- 383 2. Crain CM, Halpern BS, Beck MW, Kappel CV. Understanding and Managing  
384 Human Threats to the Coastal Marine Environment. In: Ostfeld RS, Schlesinger WH,  
385 editors. *Year in Ecology and Conservation Biology 2009*. Annals of the New York  
386 Academy of Sciences. 11622009. p. 39-62.
- 387 3. Hughes T, Connell J. Multiple stressors on coral reefs: A long-term perspective.  
388 *Limnology and oceanography*. 1999;44(3part2):932-40.
- 389 4. Brown CJ, Saunders MI, Possingham HP, Richardson AJ. Interactions between  
390 global and local stressors of ecosystems determine management effectiveness in  
391 cumulative impact mapping. *Diversity and Distributions*. 2014;20(5):538-46.
- 392 5. Gurney GG, Melbourne-Thomas J, Geronimo RC, Alino PM, Johnson CR.  
393 Modelling Coral Reef Futures to Inform Management: Can Reducing Local-Scale  
394 Stressors Conserve Reefs under Climate Change? *Plos One*. 2013;8(11):17.

## Additivity of multiple threats

- 395 6. Halpern BS, Walbridge S, Selkoe KA, Kappel CV, Micheli F, D'Agrosa C, et al. A  
396 global map of human impact on marine ecosystems. *Science*. 2008;319(5865):948-52.
- 397 7. Crain CM, Kroeker K, Halpern BS. Interactive and cumulative effects of multiple  
398 human stressors in marine systems. *Ecology Letters*. 2008;11(12):1304-15.
- 399 8. Judd AD, Backhaus T, Goodsir F. An effective set of principles for practical  
400 implementation of marine cumulative effects assessment. *Environmental Science & Policy*.  
401 2015;54:254-62.
- 402 9. Darling ES, Côté IM. Quantifying the evidence for ecological synergies. *Ecology*  
403 *letters*. 2008;11(12):1278-86.
- 404 10. Piggott JJ, Townsend CR, Matthaei CD. Reconceptualizing synergism and  
405 antagonism among multiple stressors. *Ecology and evolution*. 2015;5(7):1538-47.
- 406 11. Coors A, De Meester L. Synergistic, antagonistic and additive effects of multiple  
407 stressors: predation threat, parasitism and pesticide exposure in *Daphnia magna*. *Journal of*  
408 *Applied Ecology*. 2008;45(6):1820-8.
- 409 12. Przeslawski R, Davis AR, Benkendorff K. Synergistic effects associated with  
410 climate change and the development of rocky shore molluscs. *Global Change Biology*.  
411 2005;11(3):515-22.
- 412 13. Schlöder C, D'Croz L. Responses of massive and branching coral species to the  
413 combined effects of water temperature and nitrate enrichment. *Journal of Experimental*  
414 *Marine Biology and Ecology*. 2004;313(2):255-68.
- 415 14. Fulton EA, Link JS, Kaplan IC, Savina-Rolland M, Johnson P, Ainsworth C, et al.  
416 Lessons in modelling and management of marine ecosystems: the Atlantis experience. *Fish*  
417 *and Fisheries*. 2011;12(2):171-88.
- 418 15. Melbourne-Thomas J, Johnson C, Fulton E. Regional-scale scenario analysis for the  
419 Meso-American Reef system: Modelling coral reef futures under multiple stressors.  
420 *Ecological Modelling*. 2011;222(10):1756-70.
- 421 16. Paine RT, Tegner MJ, Johnson EA. Compounded perturbations yield ecological  
422 surprises. *Ecosystems*. 1998;1(6):535-45.

## Additivity of multiple threats

- 423 17. Folt C, Chen C, Moore M, Burnaford J. Synergism and antagonism among multiple  
424 stressors. *Limnology and oceanography*. 1999;44(3):864-77.
- 425 18. Scheffer M, Barrett S, Carpenter S, Folke C, Green AJ, Holmgren M, et al.  
426 Creating a safe operating space for iconic ecosystems. *Science*. 2015;347(6228):1317-9.
- 427 19. Tulloch VJD, Tulloch AIT, Visconti P, Halpern BS, Watson JEM, Evans MC, et al.  
428 Why do we map threats? Linking threat mapping with actions to make better conservation  
429 decisions. *Frontiers in Ecology and the Environment*. 2015;13(2):91-9.
- 430 20. Carwardine J, Wilson KA, Watts M, Etter A, Klein CJ, Possingham HP. Avoiding  
431 Costly Conservation Mistakes: The Importance of Defining Actions and Costs in Spatial  
432 Priority Setting. *PLOS ONE*. 2008;3(7):e2586.
- 433 21. Kukkala AS, Moilanen A. Core concepts of spatial prioritisation in systematic  
434 conservation planning. *Biological Reviews*. 2013;88(2):443-64.

435

## 436 SUPPORTING INFORMATION

437 **S1 Multiplicative impact on the logistic model**

438 **S2 Additive and multiplicative impact on the Beverton-Holt model**

439 **S3 Additive and multiplicative impact on the Ricker model**



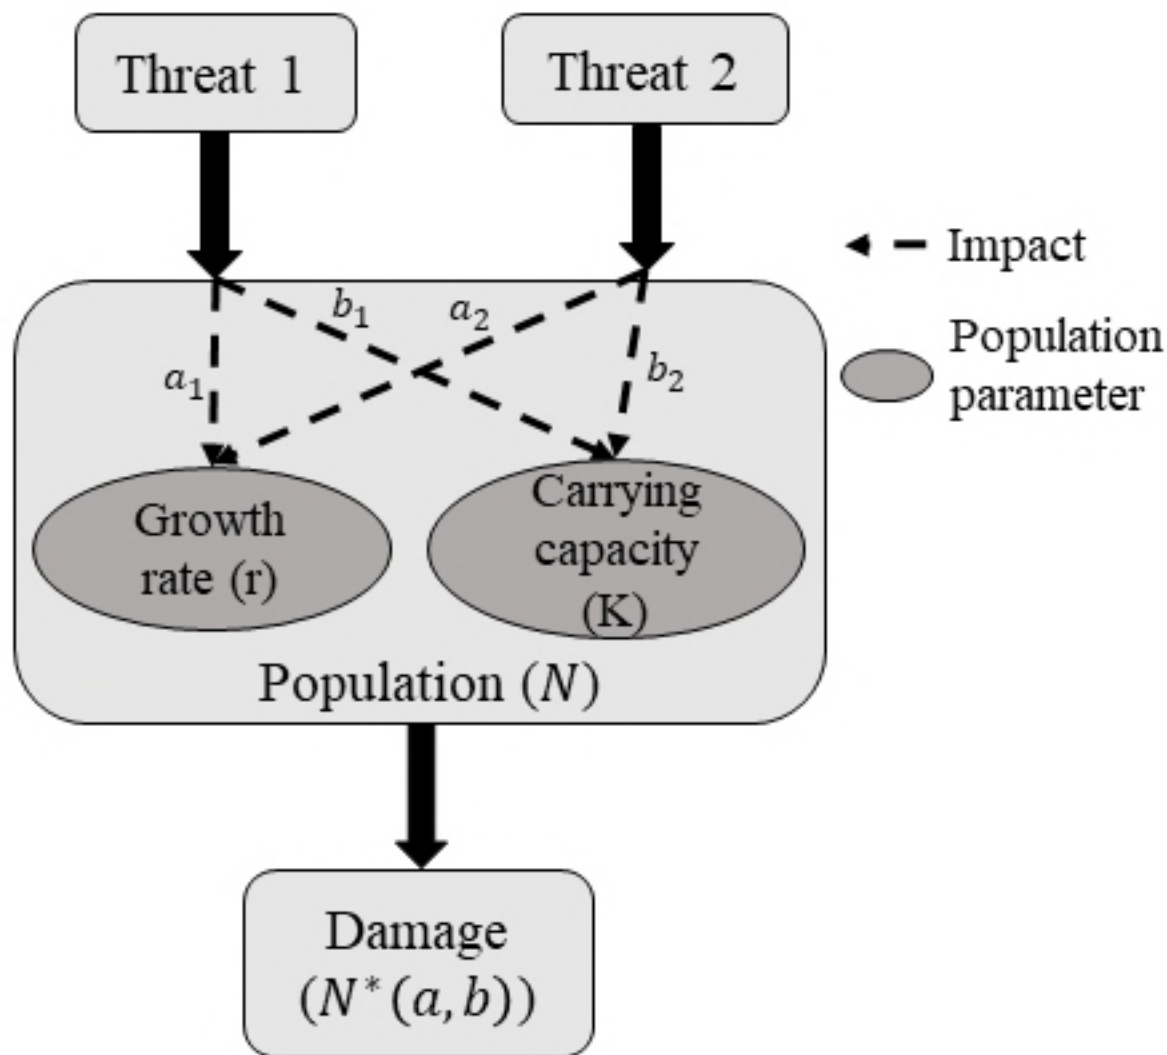

Figure 1

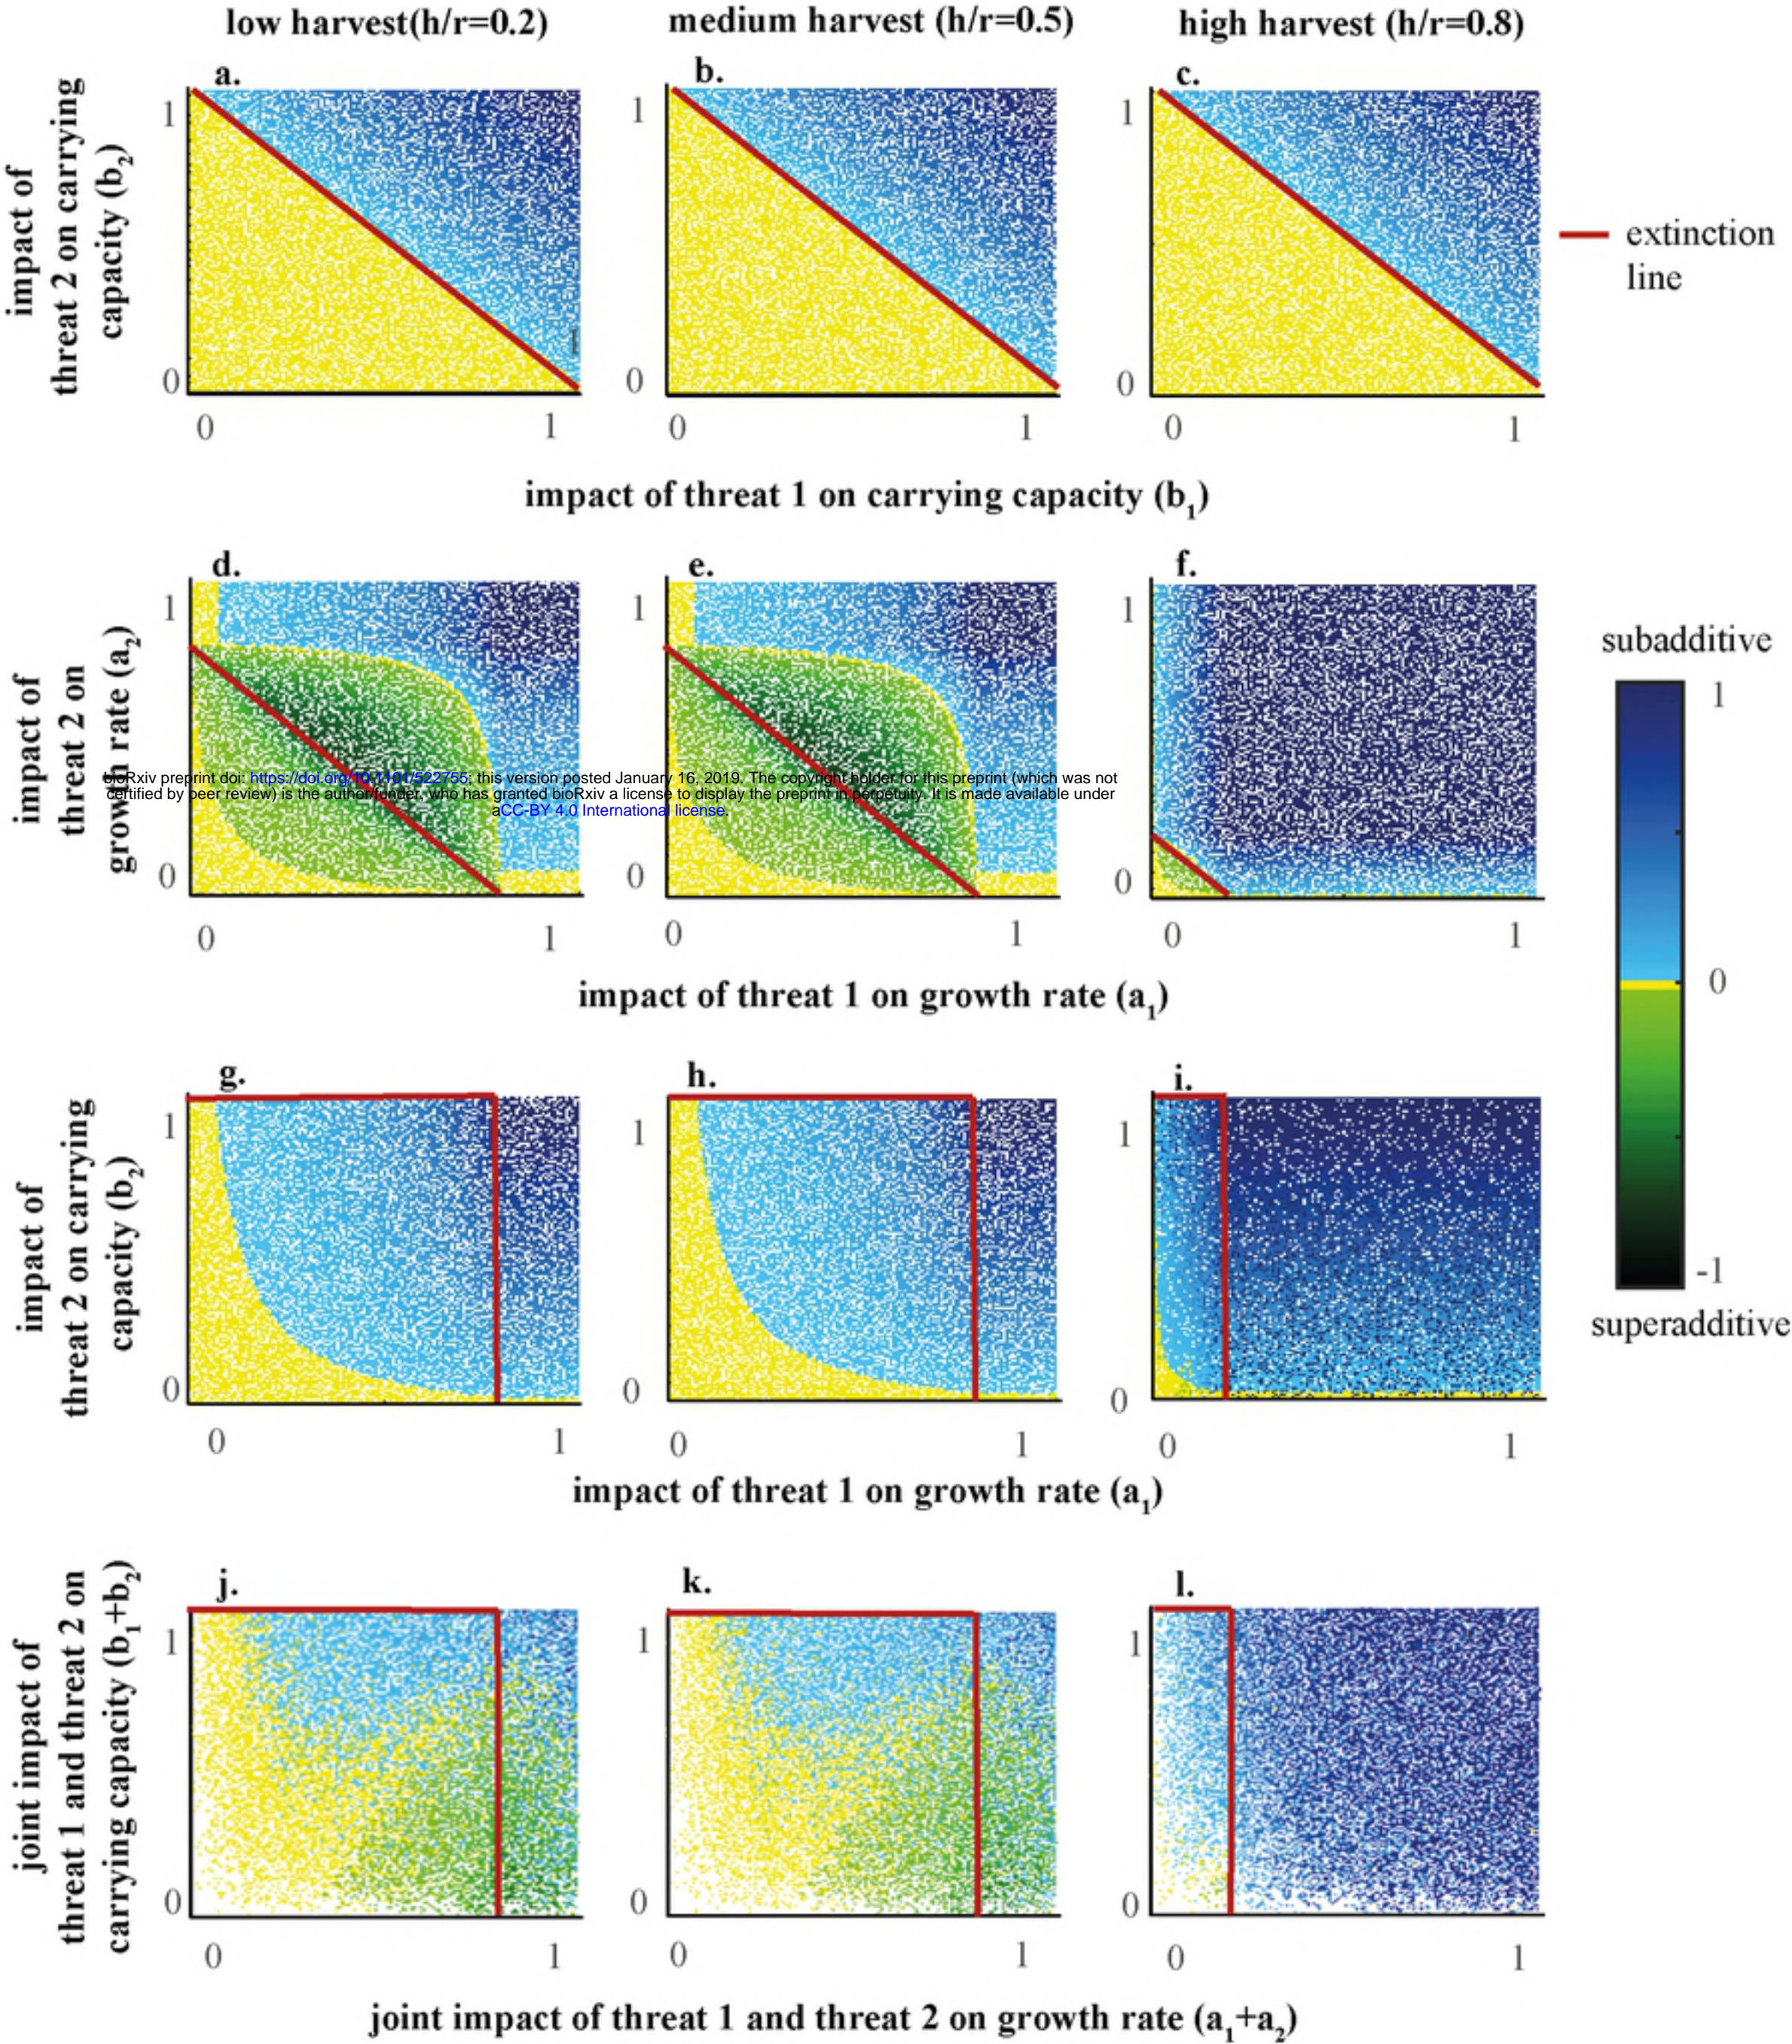

Figure 2

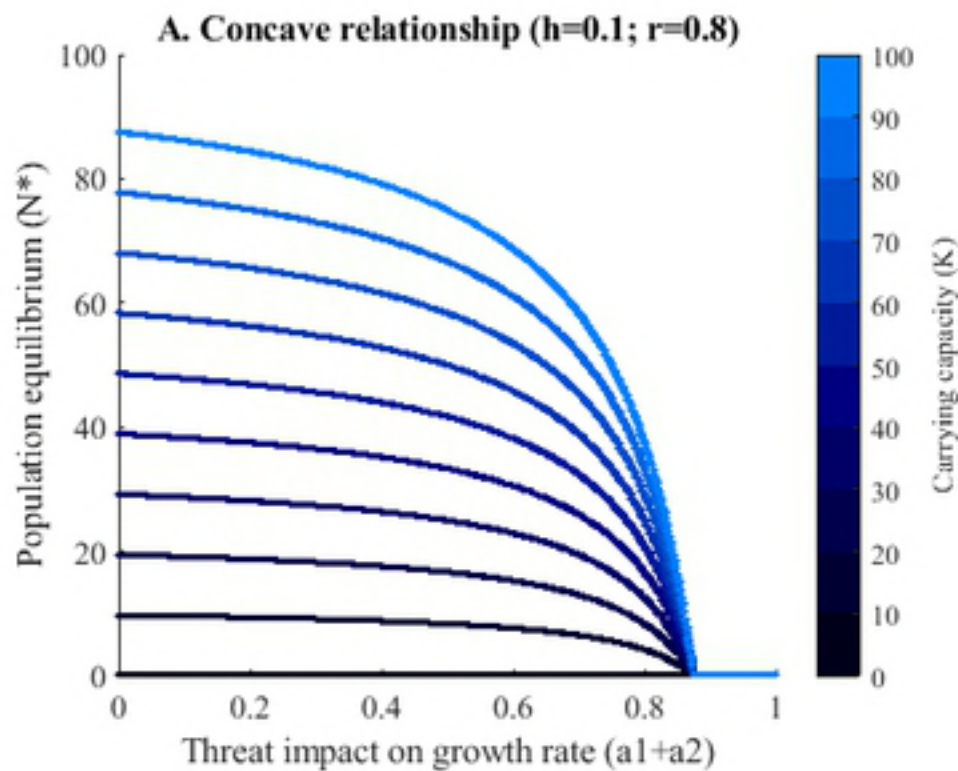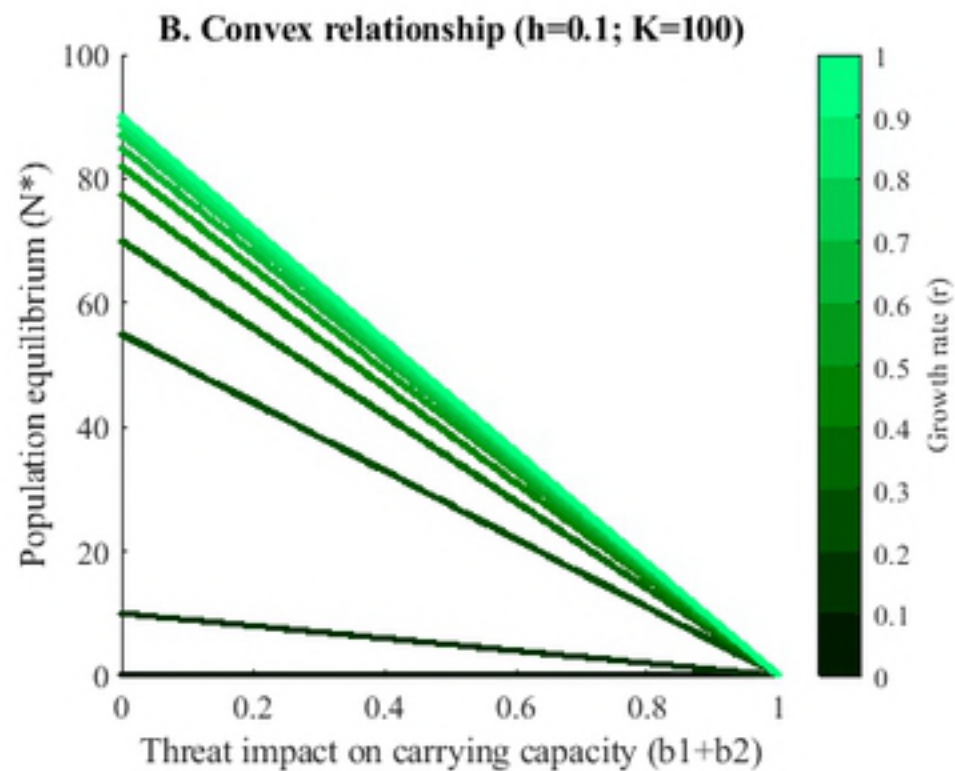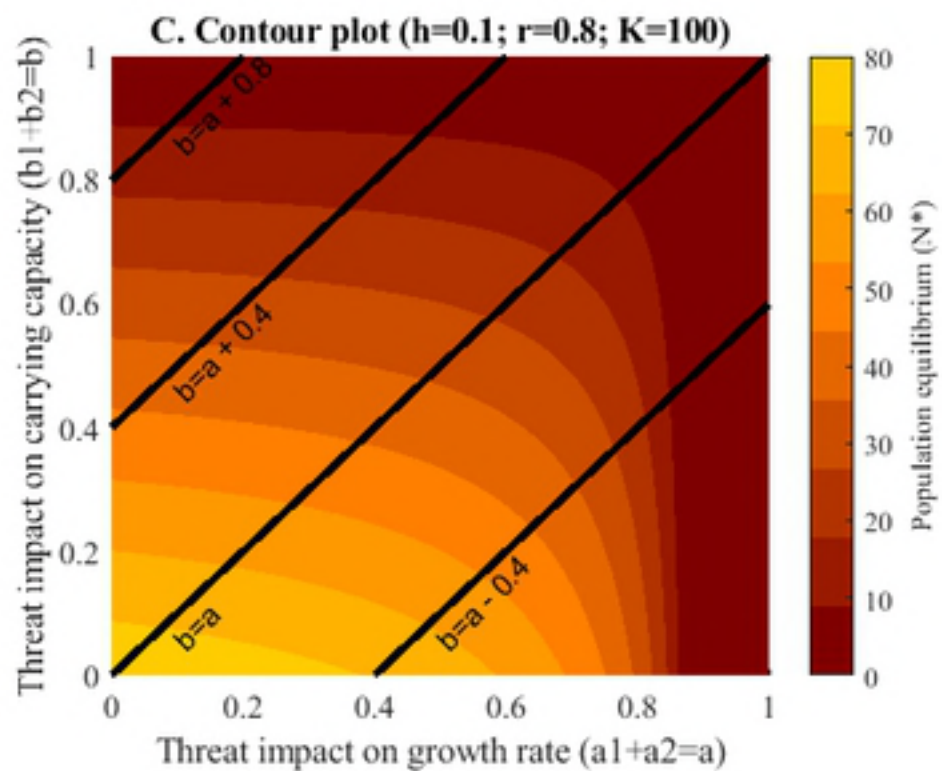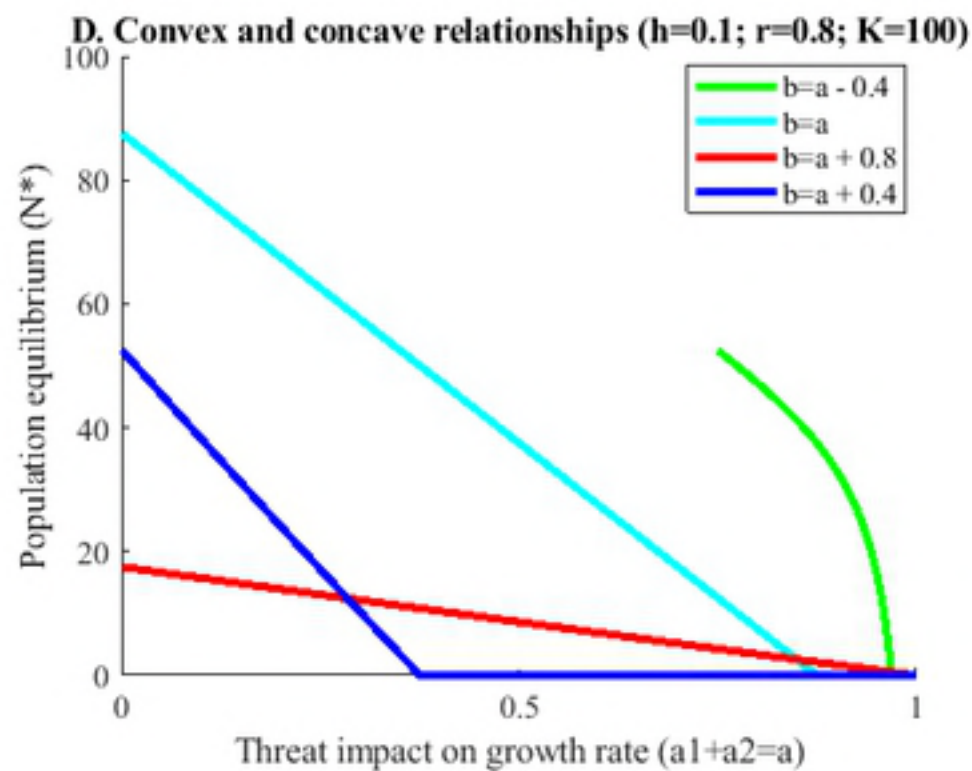

Figure 3

a) threat impact on the growth rate

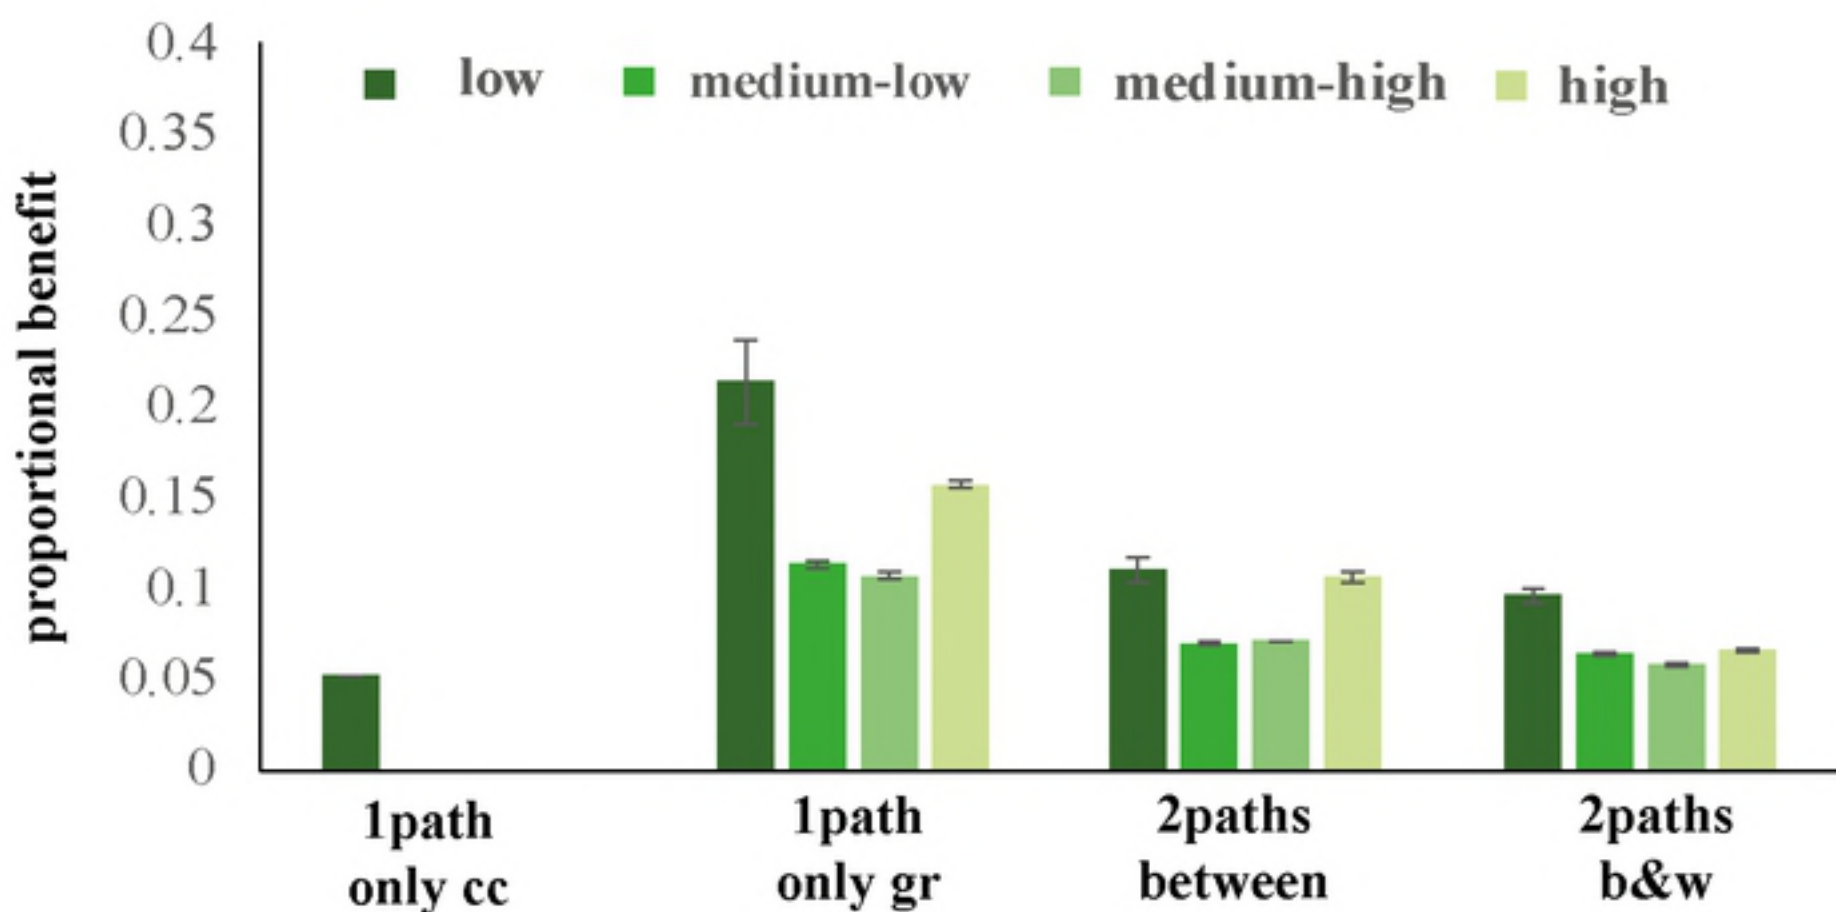

b) threat impact on the carrying capacity

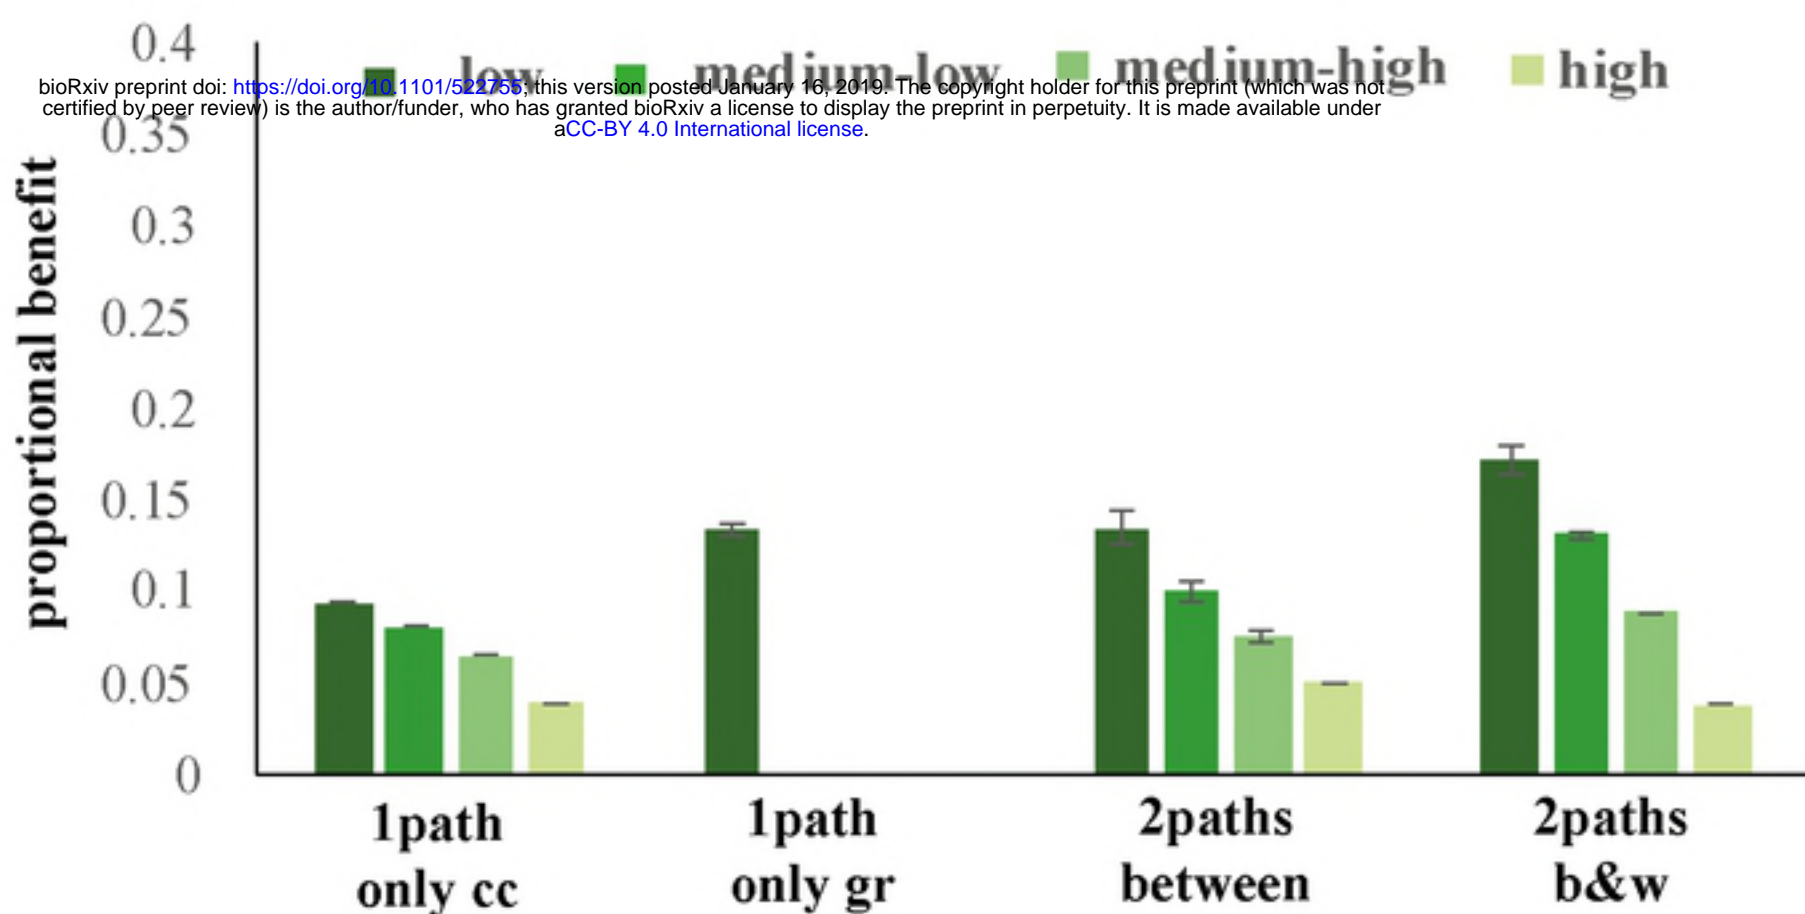

c) aditivity type

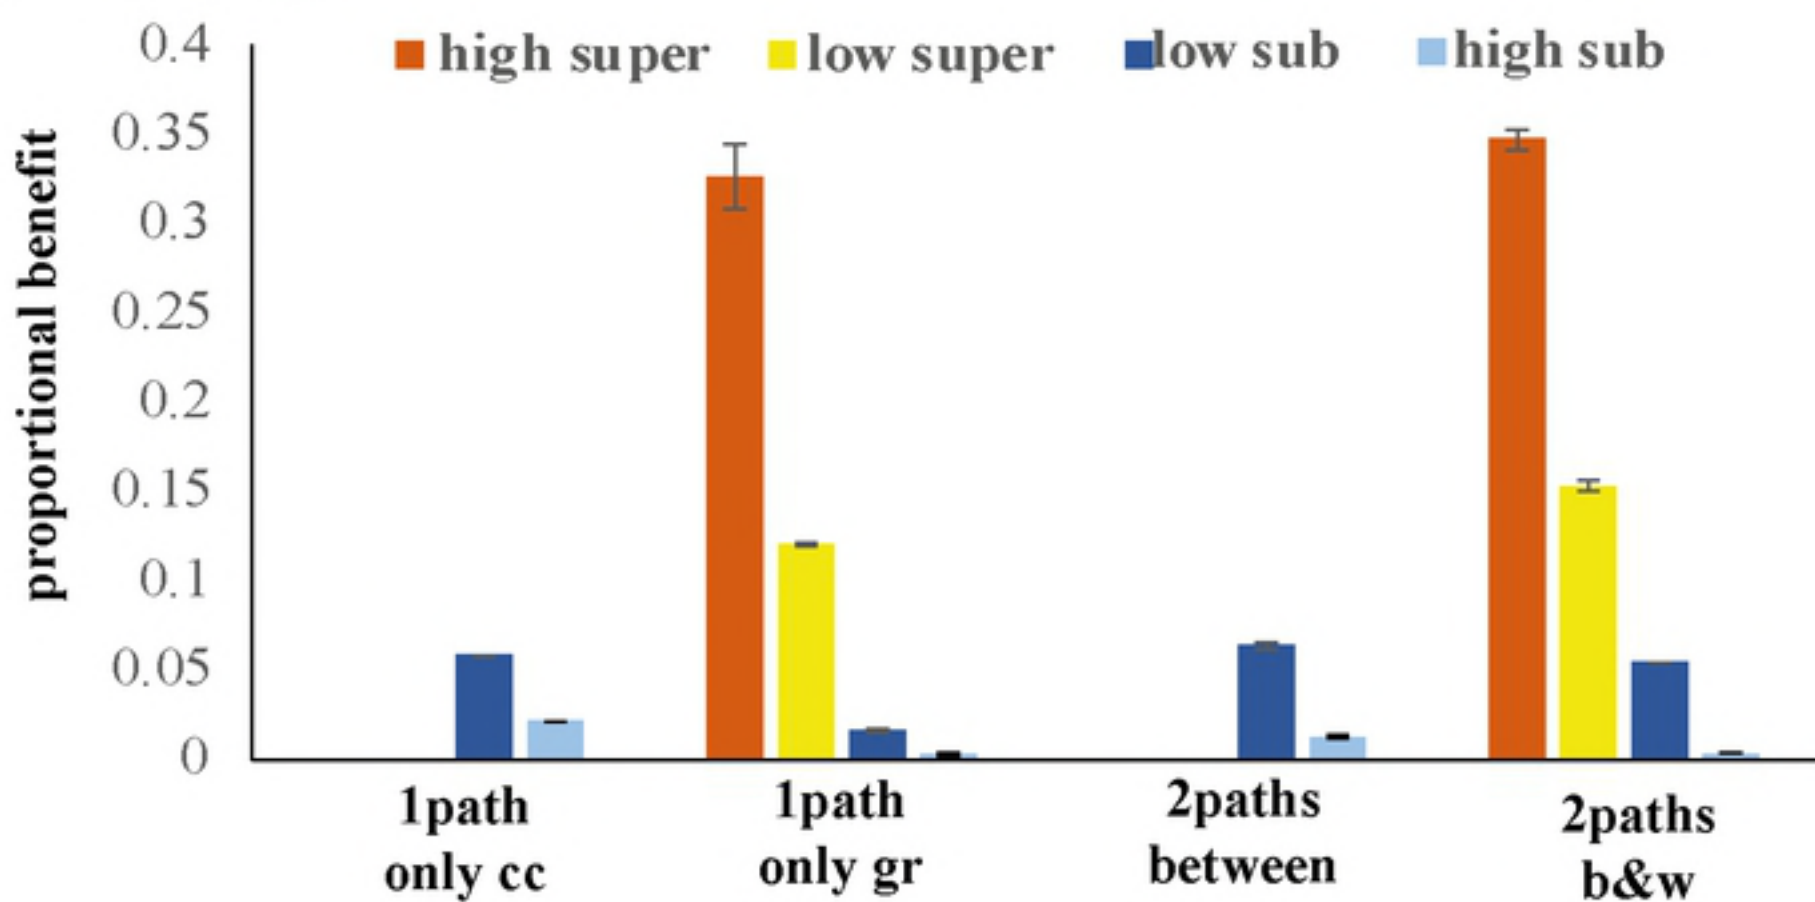

Figure 4
